# Supplementary material for: Transplantation directs oocyte maturation from embryonic stem cells and provides a therapeutic strategy for female infertility
Source: PubMed Central journal article supplement — Hum Mol Genet. 2009 Aug 20;18(22):4376–89. doi: 10.1093/hmg/ddp393 (PMC2766296; doi:10.1093/hmg/ddp393), 2009-08-20

## SUPPLEMENTARY MATERIAL

### **Figure S1. Endogenous Fetal Oocytes Express $\Delta$ PE *Oct4*-GFP at Low Intensity and Lack SSEA1 Expression**

(A) *Oct4*-GFP was expressed at high intensity in transgenic ESCs, female/male genital ridge at e12.5, and e15.5 fetal testis but was expressed at low intensity in oocytes from post-committed e15.5 ovary by flow cytometry analysis. The high intensity GFP+ gate was based on transgenic ESC and e12.5 PGC intensity. The low intensity GFP+ gate was set below the high intensity gate and above non-transgenic GFP- cells (solid peak).

(B) Undifferentiated ESCs and PGCs from e12.5 genital ridge were SSEA1+, but e15.5 ovary and testis lacked robust SSEA1 expression. Solid peak represents ESCs stained with only secondary antibody. X-axis: fluorescence intensity. Y-axis: cell number.

### **Figure S2. Confirmation of *Oct4*-GFP+ ESC-derived Oocyte Maturation**

(A) Transcripts expressed beginning in pre-meiotic germ cells (*Oct4*, *Stella*, *Nanos3*, and *Vasa*) were enriched in the double-positive population while markers of meiotic entry and oocyte maturation (*Stra8* and *Gdf9*) were elevated in GFP+ / SSEA1- cells by quantitative RTPCR analysis. Somatic cell markers (*Kdr* and *Sox1*) were robustly detected in the double-negative population with minimal levels observed in GFP+ germ cells. *Hoxa1* was expressed in endogenous somatic and germ cells and was also detected in all ESC-derived populations.

(B) *Oct4*-GFP+ ESC-derived germ cell maturation was confirmed by single-cell quantitative RTPCR expression profiling of meiotic germ cell transcripts before *in vitro* differentiation and after 5 days of differentiation (-/+ FAC media. Meiotic transcripts

were elevated following differentiation in FAC media compared to ESCs and non-FAC treated cultures. Relative expression ( $2^{(-\Delta Ct)}$  relative to *Gapdh*).

**Figure S3. Single *Oct4*-GFP+ Cells are more likely to Express Germ Cell Marker Transcripts following Differentiation**

Although a fraction of the undifferentiated GFP+ ESCs expressed germ cell markers, a greater percentage of GFP+ cells expressed germ cell transcripts following differentiation by quantitative RTPCR analysis. Relative expression ( $2^{(-\Delta Ct)}$  relative to *Gapdh*).

**Figure S4. Single *Oct4*-GFP+ Cells are enriched for Germ Cell Transcripts following Differentiation**

Transcript levels were increased following 5 days of differentiation by quantitative RTPCR analysis, and were elevated with significance following differentiation in FAC media, compared to undifferentiated GFP+ ESCs. Transcript levels were normalized ( $2^{(-\Delta Ct)}$  relative to *Gapdh*), and single-cell values were averaged for each population. Significance of D5+FAC to D0 ESC ( $p=0.0048$ ). Significance of D5+FAC to D5 ( $p=0.0071$ ).

**Figure S5. *Stra8*-GFP ESC-derived Meiotic Entry**

(A and B) Similar to *Oct4*-GFP ESC flow cytometry analysis, *Stra8*-GFP is expressed in most cells before and throughout the differentiation time course with a reduction in

SSEA1 expression by day 14 of differentiation and by day 7 in FAC media. X-axis: GFP intensity. Y-axis: SSEA1 intensity.

(C) *Stra8*-GFP<sup>+</sup> cells isolated from day 14 EBs by FACS were enriched for meiotic marker transcripts by RTPCR analysis (*Stra8*, *Scp3*, *Scp1*, normalized to *UbiquitinB*).

(D) *Stra8*-GFP<sup>+</sup> ESC-derived germ cell meiotic entry and early progression demonstrated by immunofluorescence staining for SCP3 showing nuclear localization and partial SCP3 chromosomal alignment.

(E) Endogenous pachytene spermatocyte control illustrating complete SCP3 and SCP1 chromosomal alignment with telocentric CREST centromere staining.

(F) Endogenous leptotene-zygotene spermatocyte controls with nuclear SCP3 and punctate  $\gamma$ -H2AX expression.

(G) Endogenous pachytene spermatocyte controls showing complete SCP3 chromosomal alignment and  $\gamma$ -H2AX localization to the XY body.

(D, F and G) Blue is DAPI. (D) to (G) magnification is 630X.

### **Figure S6. ESC and Ovary Immunostaining Controls**

(A and B) TRA98 immunofluorescence stain of undifferentiated ESCs (A) and newborn ovary (B) showing robust oocyte-specific expression.

(C and D) GFP and SSEA1 co-immunofluorescence stain of transgenic *Oct4*-GFP undifferentiated ESCs (C) and adult ovary (D) confirming a lack of SSEA1 expression by oocytes. Blue is DAPI. Magnification is 200X.

Figure S1.

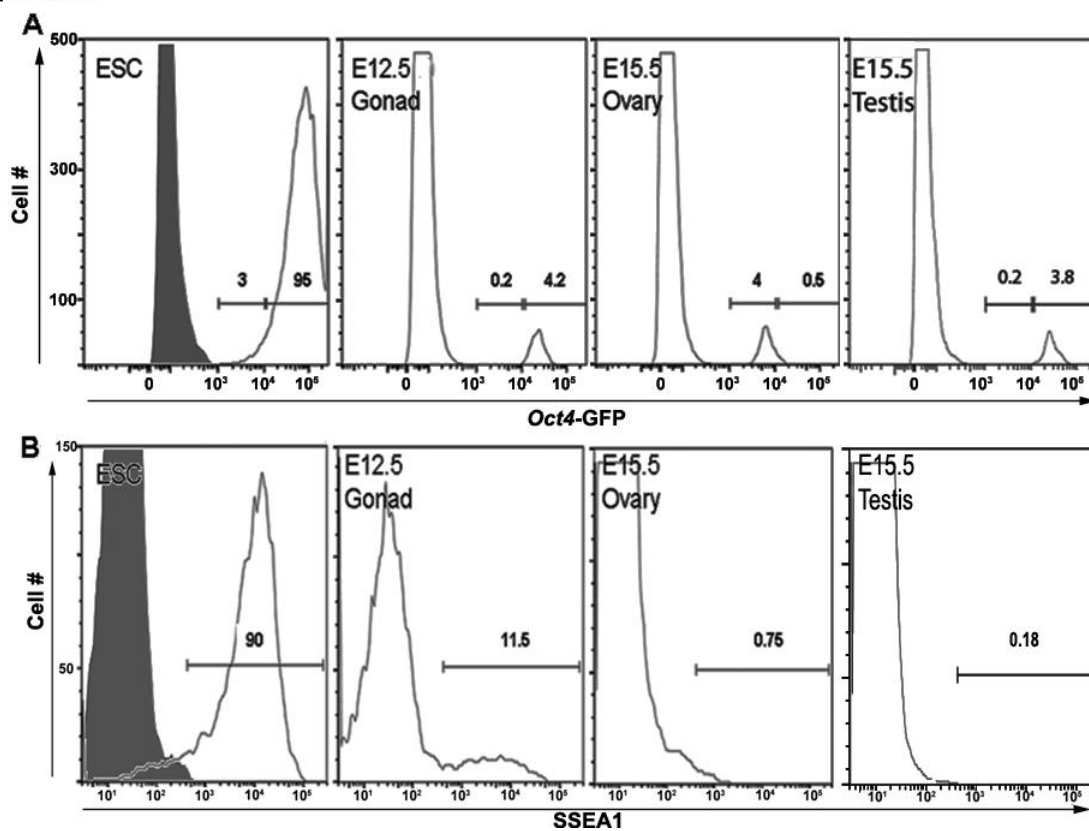

Figure S2.

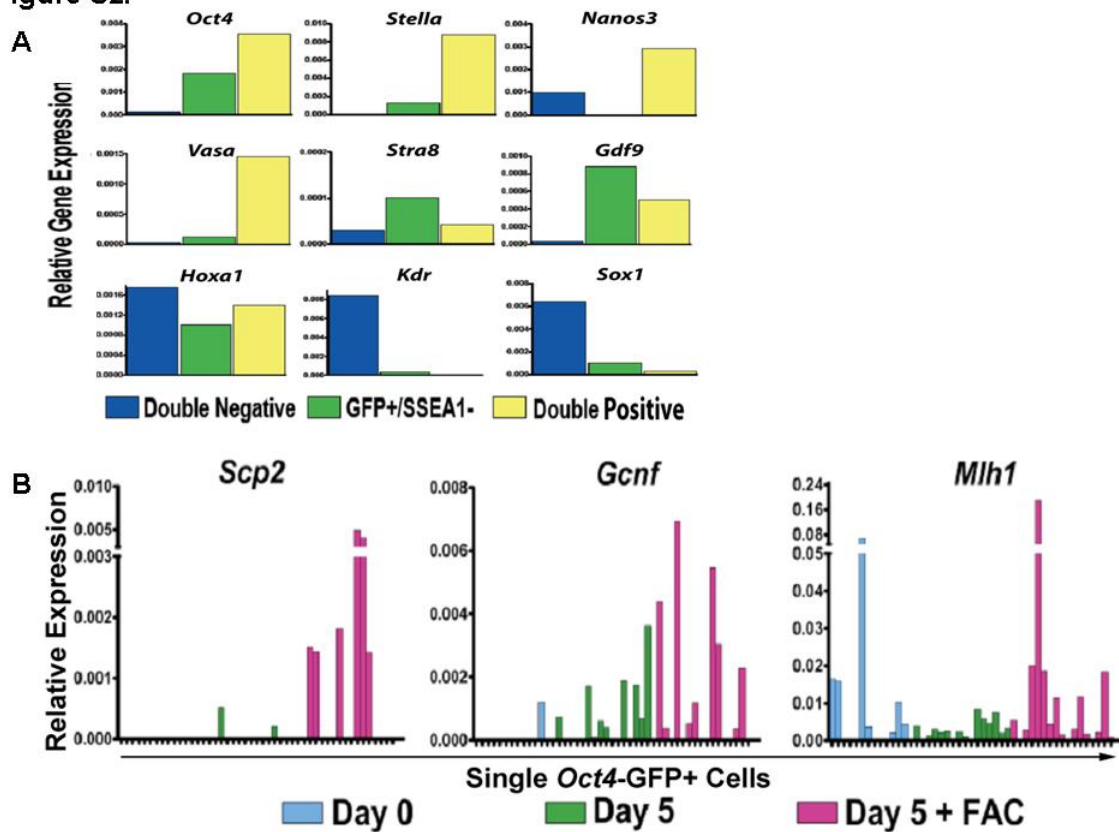

Figure S3.

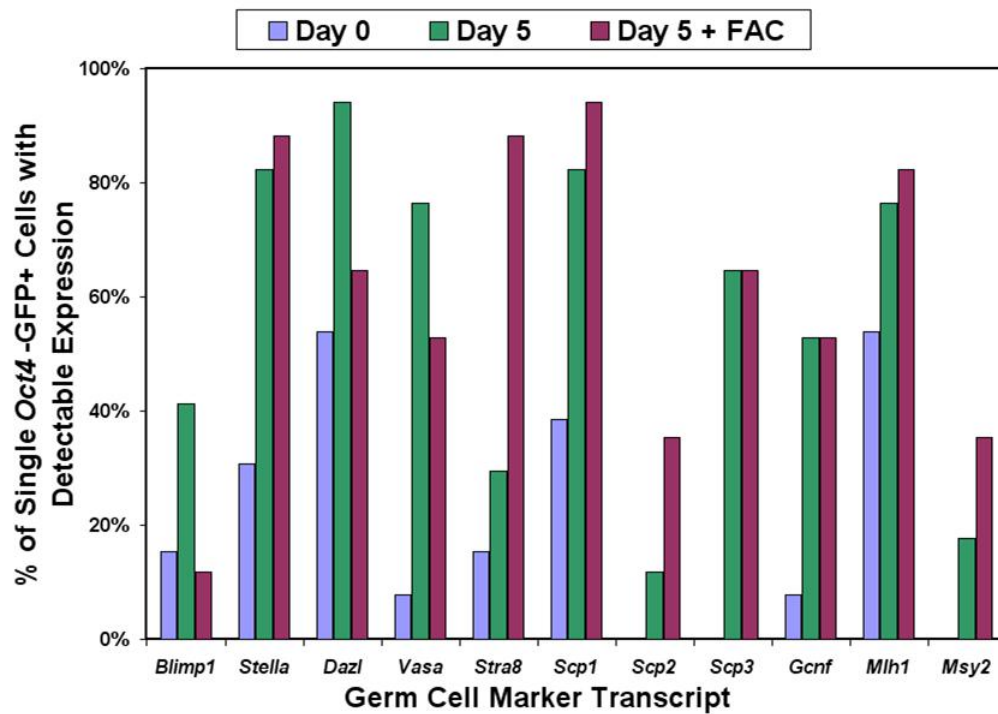

Figure S4.

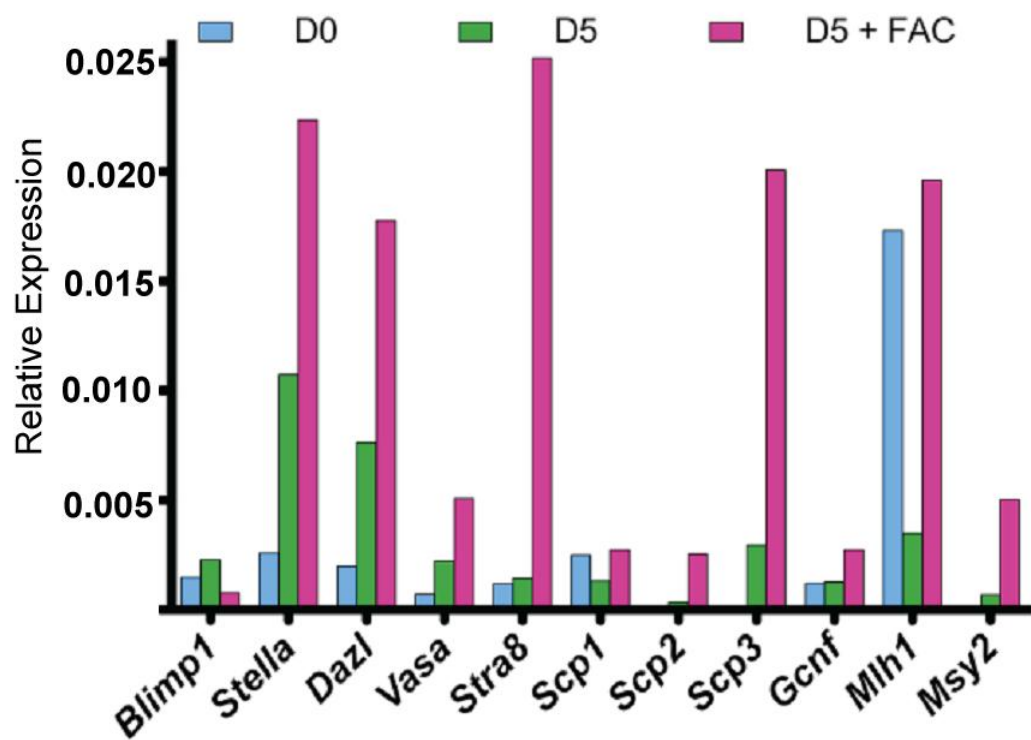

Figure S5.

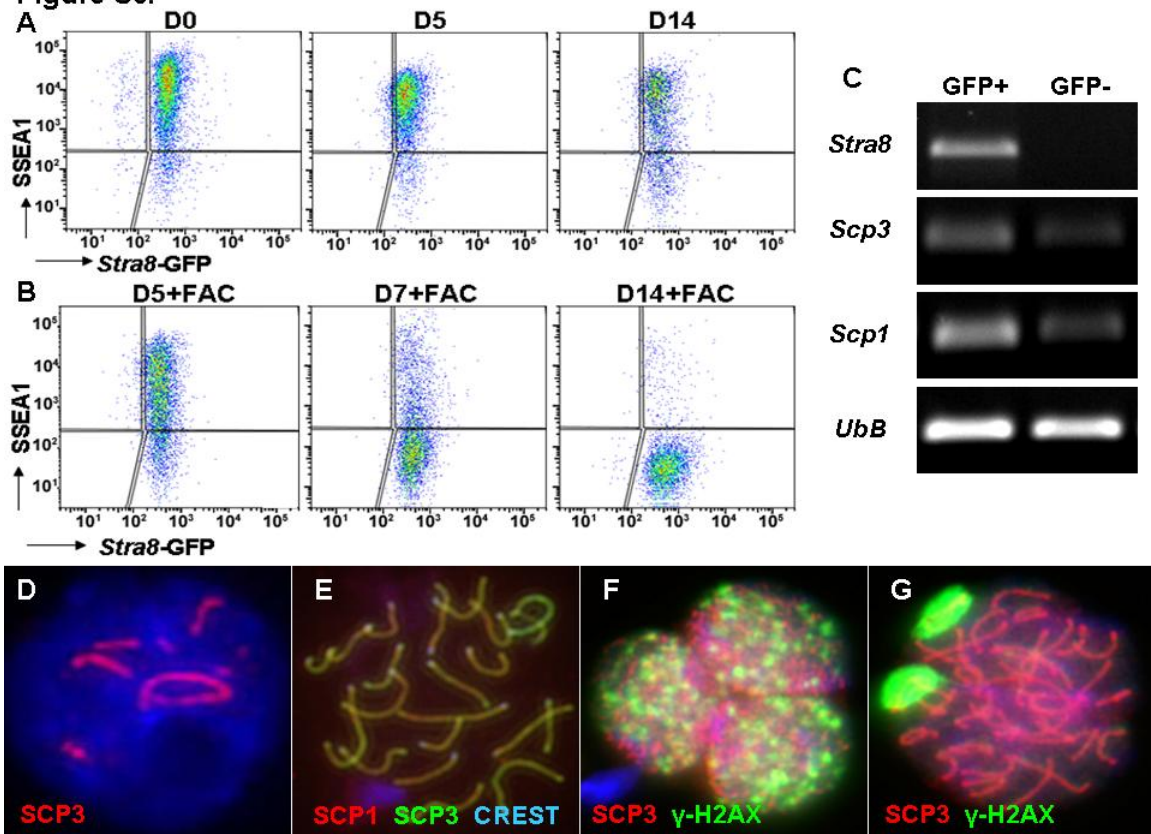



Figure S6.

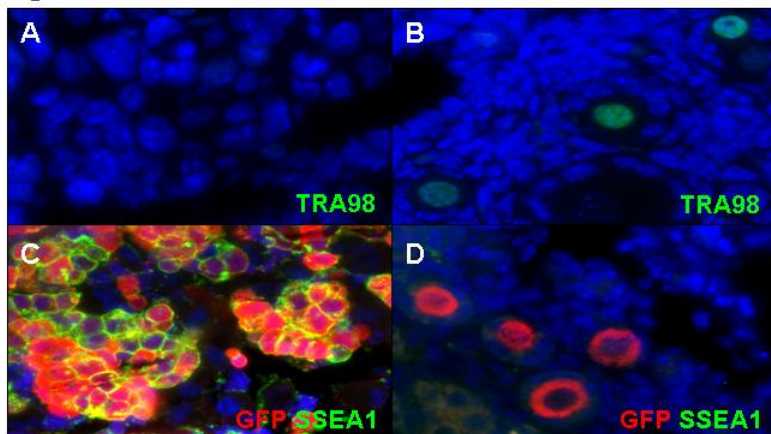

Supplement: ddp393_1.pdf [file ddp393_1.pdf]
